# Supplementary material for: Use of porous cellulose microcapsules for water treatment
Source: Royal Society of Chemistry journal article supplement (doi:10.1039/c5ra10609e), 2015-01-01
Supplement: c5ra10609e1.pdf [file c5ra10609e1.pdf]

## Use of Porous Cellulose Microcapsules for Water Treatment

Daisy Setyono, Suresh Valiyaveetil\*

Department of Chemistry, National University of Singapore, Singapore 117543

E-mail: [chmsv@nus.edu.sg](mailto:chmsv@nus.edu.sg)

### Supporting Information

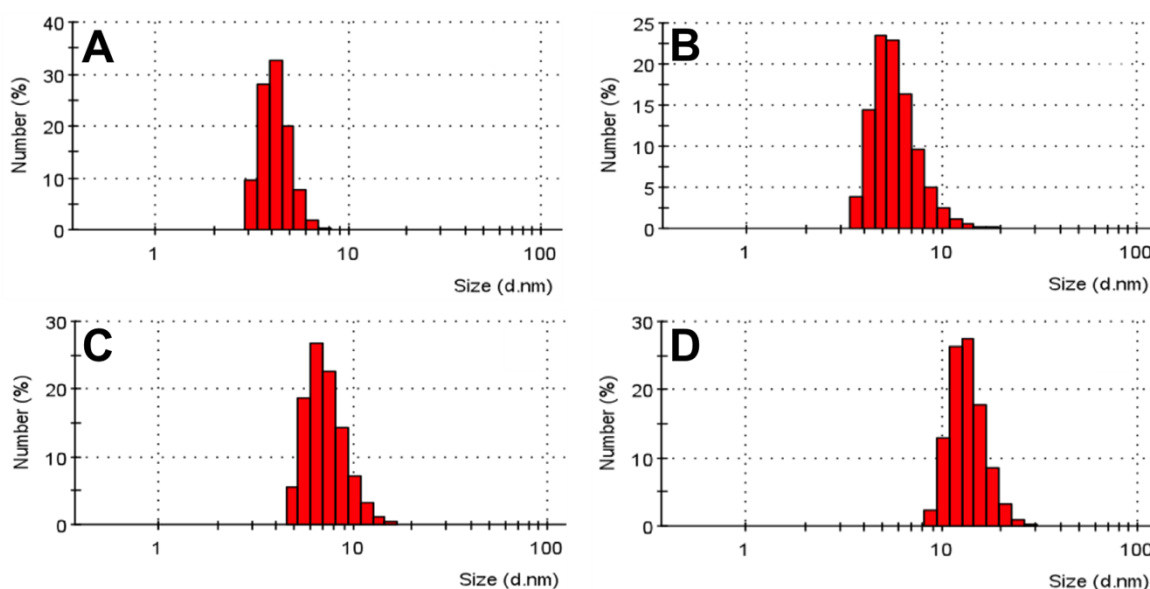

Fig. S1. Number size distribution of Ag-cit (A), Ag-PVP (B), Au-cit (C), Au-PVP NPs (D) as obtained from DLS measurements.

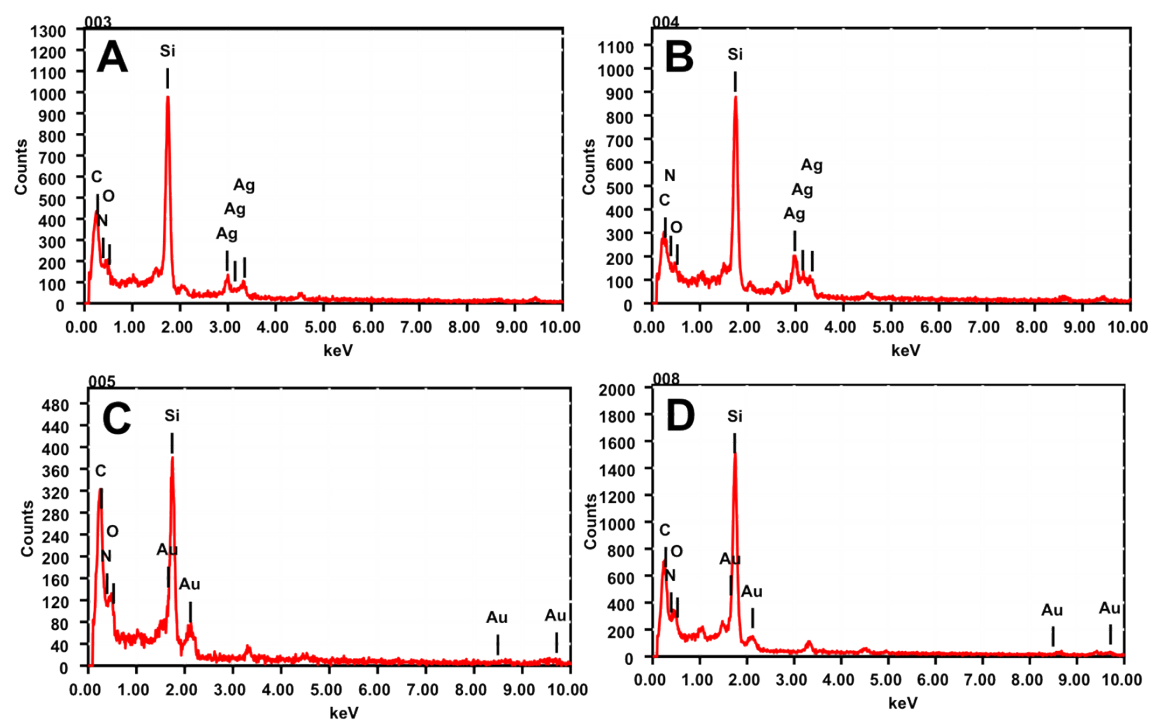

Fig. S2. EDS spectrum of Ag-cit (A), Ag-PVP (B), Au-cit (C), Au-PVP NPs (D) adsorbed on PEI-MC.

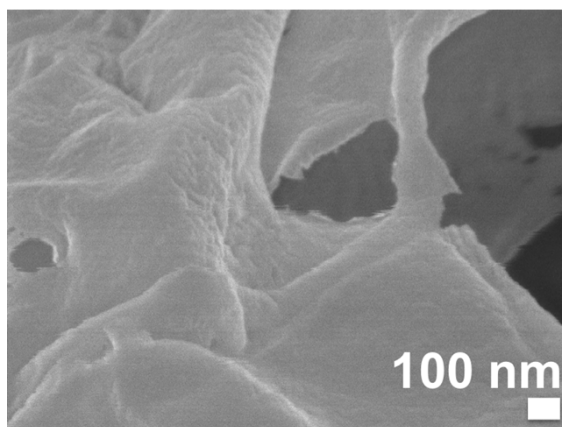

Figure S3. High magnification SEM image of PEI-MC.

Table S1. Various Ag and Au NPs adsorbents and their maximum Langmuir capacities ( $Q_m$ ) or kinetics adsorption capacities ( $q_e$ ).

| Adsorbent                                                                   | Langmuir/kinetics adsorption capacity (mg/g) |        |        |        |
|-----------------------------------------------------------------------------|----------------------------------------------|--------|--------|--------|
|                                                                             | Ag-cit                                       | Ag-PVP | Au-cit | Au-PVP |
| Amine-functionalized electrospun poly(vinyl alcohol) membrane <sup>21</sup> | 56                                           | -      | 79-84  | -      |
| Activated carbon <sup>22</sup>                                              | 65                                           | -      | -      | -      |
| Chitosan-functionalized cellulosic nanofibers <sup>23</sup>                 | 13.1                                         | 13.1   | 17.9   | 17.4   |
| Biomimetic NiO <sup>24</sup>                                                | -                                            | 54.8   | -      | 76.8   |
| PVA/Gluten hybrid nanofibers <sup>25</sup>                                  | 31.8                                         | -      | 36.5   | -      |
| Amine-functionalized block copolymer <sup>26</sup>                          | 225                                          | 115.2  | 98     | 108.2  |
| PEI-MC (this study)                                                         | 270                                          | 208    | 116    | 50     |

The equations in Figure 9 were formed by plotting the relevant XY scatter chart and using the linear regression function in Microsoft Excel with order = 2.
